# Supplementary material for: Trend Shifts in Age-Specific Incidence for In Situ and Invasive Cutaneous Melanoma in Sweden
Source: MDPI journal article supplement (doi:10.3390/cancers13112838), 2021-06-07
Supplement: s1 [file s1]

**Figure S1.** Trends in annual percentage change (APC) in age-standardized incidence rates for *in situ* and invasive cutaneous melanoma by tumour thickness and sex, in Sweden 1997-2018.

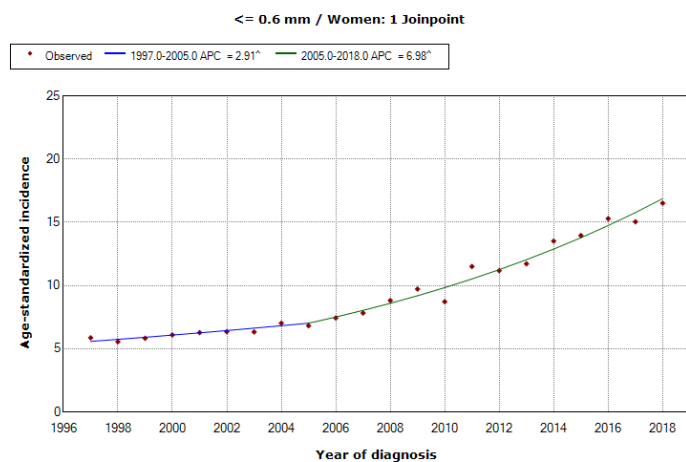

<sup>^</sup> Indicates that the Annual Percent Change (APC) is significantly different from zero at the alpha = 0.05 level.  
Final Selected Model: 1 Joinpoint.

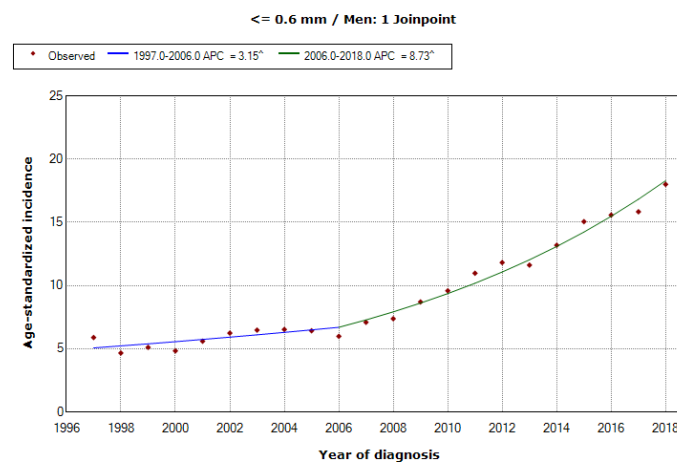

<sup>^</sup> Indicates that the Annual Percent Change (APC) is significantly different from zero at the alpha = 0.05 level.  
Final Selected Model: 1 Joinpoint.

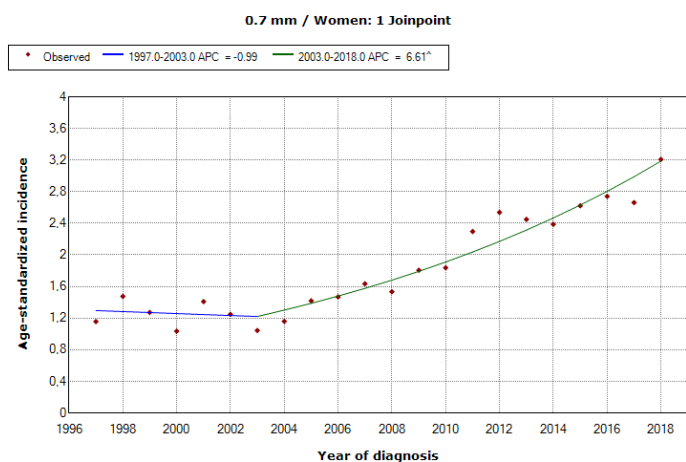

<sup>^</sup> Indicates that the Annual Percent Change (APC) is significantly different from zero at the alpha = 0.05 level.  
Final Selected Model: 1 Joinpoint.

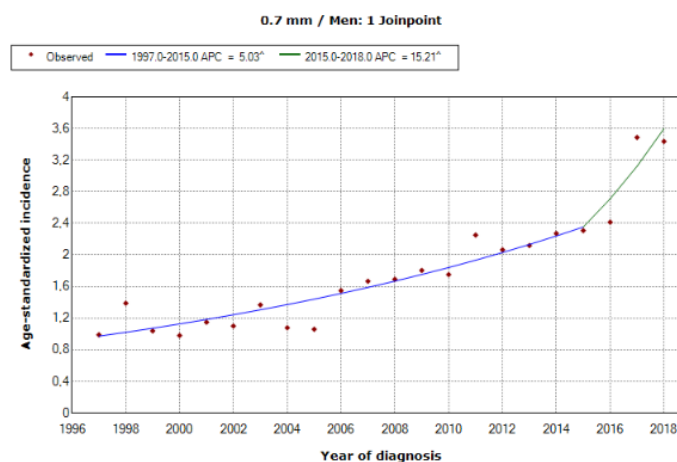

<sup>^</sup> Indicates that the Annual Percent Change (APC) is significantly different from zero at the alpha = 0.05 level.  
Final Selected Model: 1 Joinpoint.

0.8 mm / Women: 0 Joinpoints

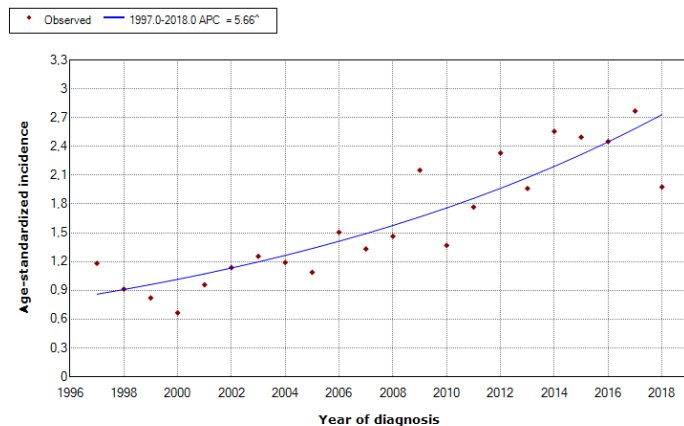

<sup>^</sup> Indicates that the Annual Percent Change (APC) is significantly different from zero at the alpha = 0.05 level.  
Final Selected Model: 0 Joinpoints.

0.8 mm / Men: 0 Joinpoints

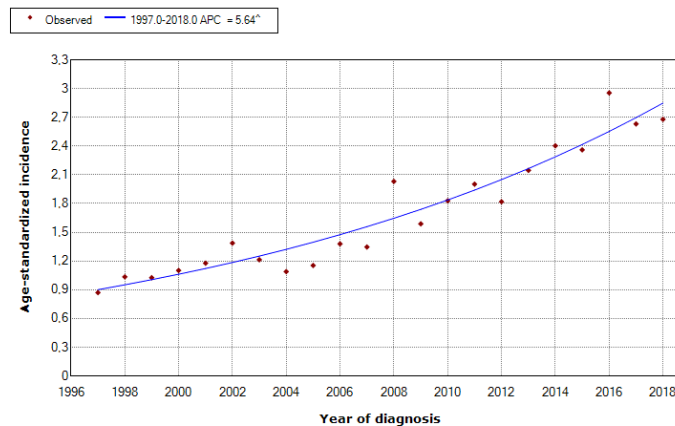

<sup>^</sup> Indicates that the Annual Percent Change (APC) is significantly different from zero at the alpha = 0.05 level.  
Final Selected Model: 0 Joinpoints.

0.9 mm / Women: 0 Joinpoints

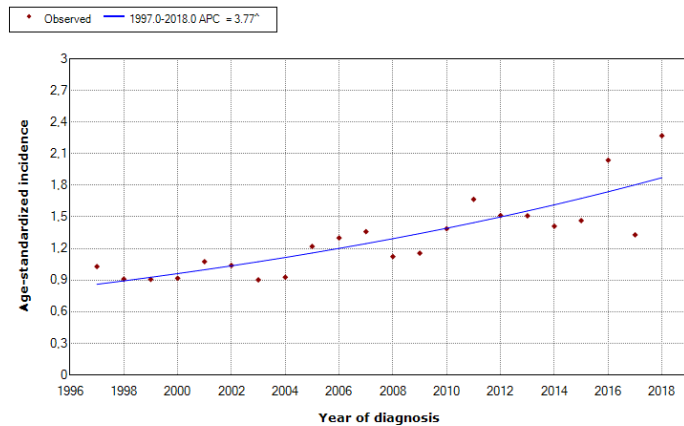

<sup>^</sup> Indicates that the Annual Percent Change (APC) is significantly different from zero at the alpha = 0.05 level.  
Final Selected Model: 0 Joinpoints.

0.9 mm / Men: 0 Joinpoints

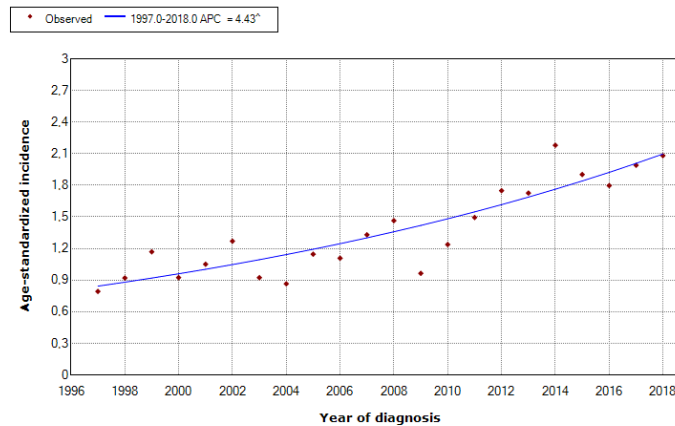

<sup>^</sup> Indicates that the Annual Percent Change (APC) is significantly different from zero at the alpha = 0.05 level.  
Final Selected Model: 0 Joinpoints.

1.0 mm / Women: 0 Joinpoints

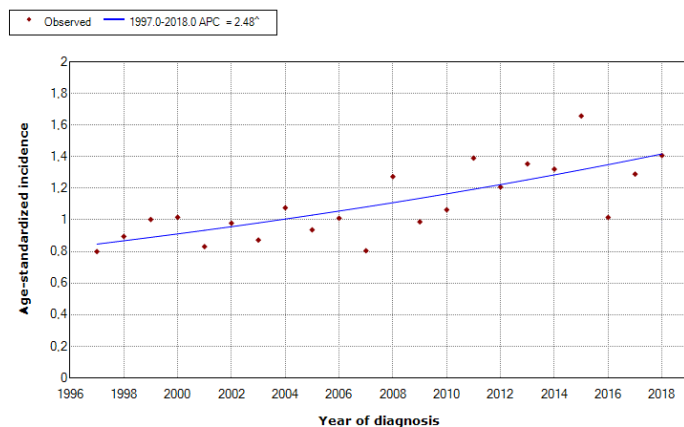

^ Indicates that the Annual Percent Change (APC) is significantly different from zero at the alpha = 0.05 level.  
Final Selected Model: 0 Joinpoints.

1.0 mm / Men: 0 Joinpoints

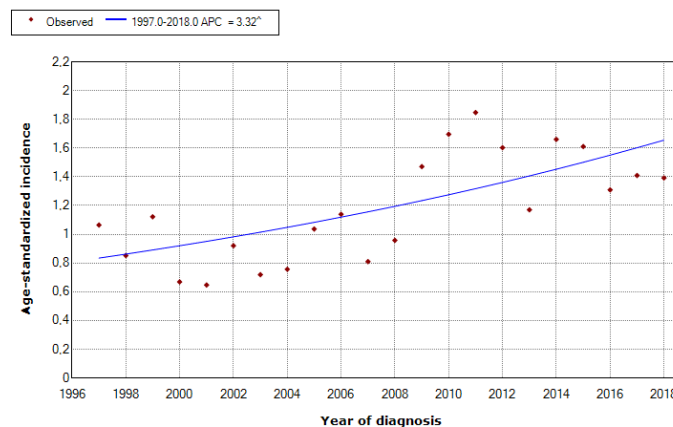

^ Indicates that the Annual Percent Change (APC) is significantly different from zero at the alpha = 0.05 level.  
Final Selected Model: 0 Joinpoints.

1.1-2.0 mm / Women: 0 Joinpoints

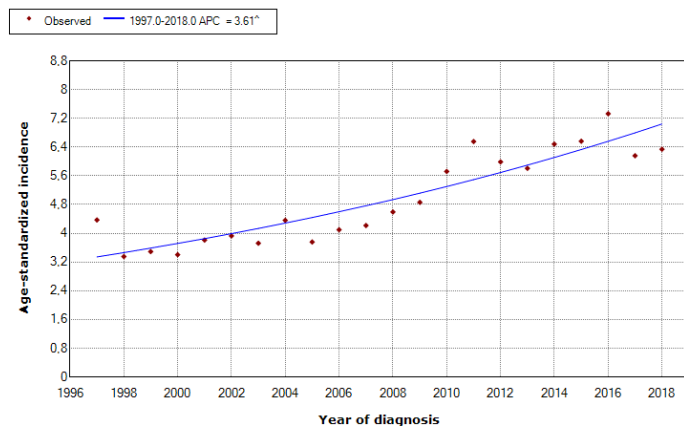

^ Indicates that the Annual Percent Change (APC) is significantly different from zero at the alpha = 0.05 level.  
Final Selected Model: 0 Joinpoints.

1.1-2.0 mm / Men: 0 Joinpoints

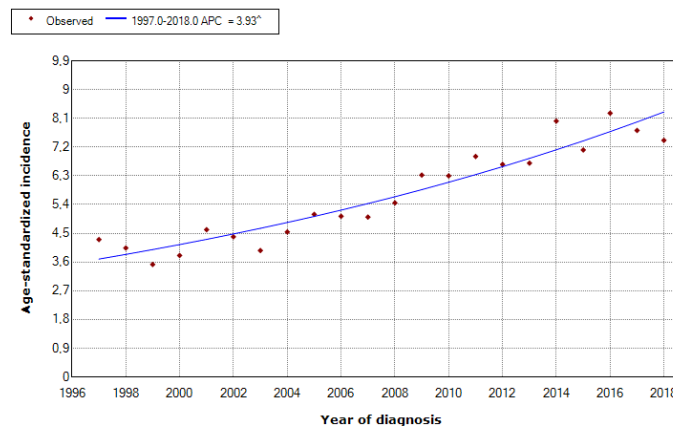

^ Indicates that the Annual Percent Change (APC) is significantly different from zero at the alpha = 0.05 level.  
Final Selected Model: 0 Joinpoints.

**2.1-4.0 mm / Women: 1 Joinpoint**

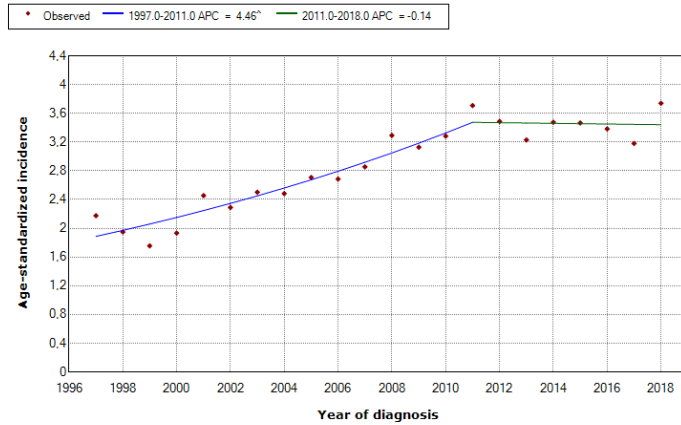

<sup>^</sup> Indicates that the Annual Percent Change (APC) is significantly different from zero at the alpha = 0.05 level.  
Final Selected Model: 1 Joinpoint.

**2.1-4.0 mm / Men: 1 Joinpoint**

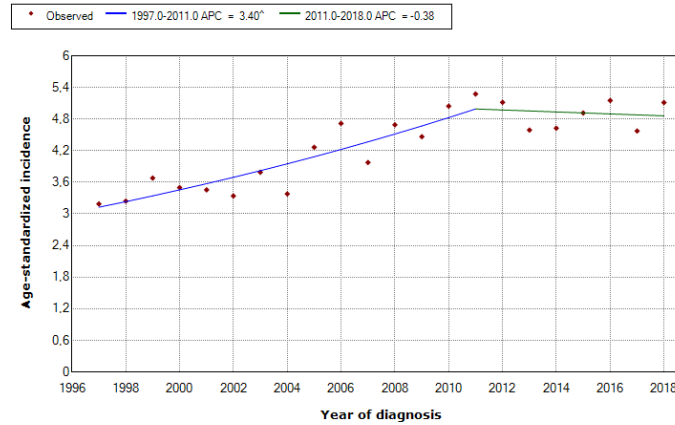

<sup>^</sup> Indicates that the Annual Percent Change (APC) is significantly different from zero at the alpha = 0.05 level.  
Final Selected Model: 1 Joinpoint.

**> 4.0 mm / Women: 1 Joinpoint**

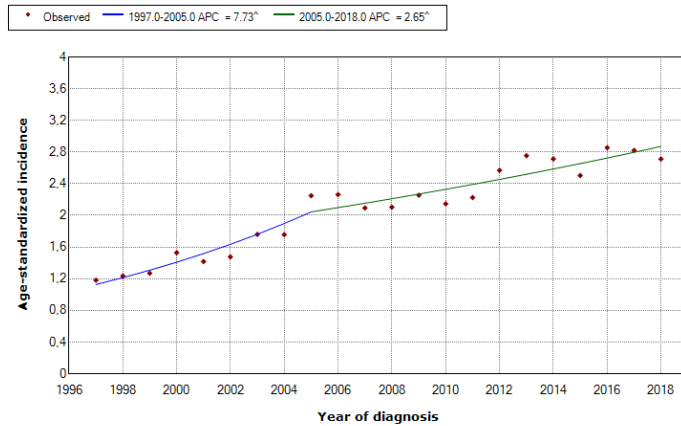

<sup>^</sup> Indicates that the Annual Percent Change (APC) is significantly different from zero at the alpha = 0.05 level.  
Final Selected Model: 1 Joinpoint.

**> 4.0 mm / Men: 0 Joinpoints**

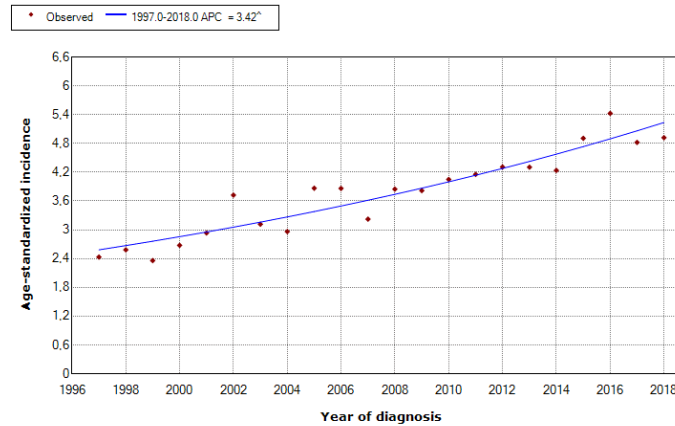

<sup>^</sup> Indicates that the Annual Percent Change (APC) is significantly different from zero at the alpha = 0.05 level.  
Final Selected Model: 0 Joinpoints.

**All / Women: 0 Joinpoints**

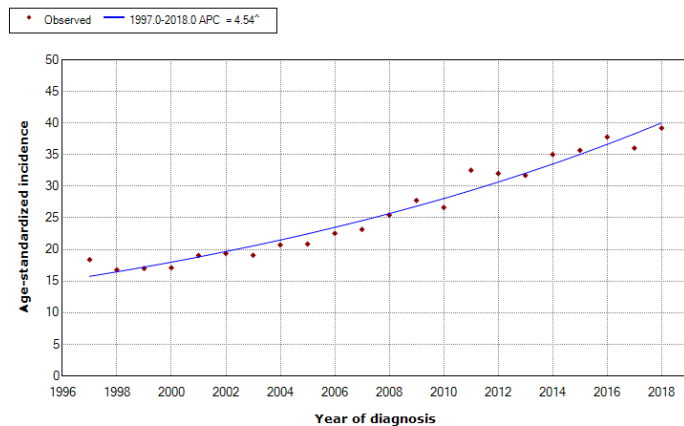

<sup>\*</sup> Indicates that the Annual Percent Change (APC) is significantly different from zero at the alpha = 0.05 level.  
Final Selected Model: 0 Joinpoints.

**All / Men: 1 Joinpoint**

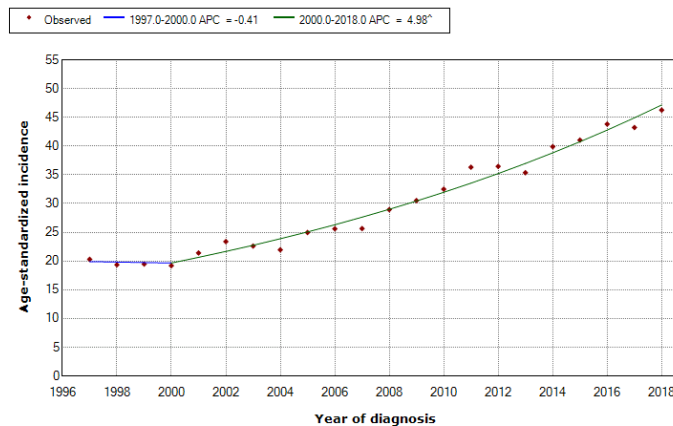

<sup>\*</sup> Indicates that the Annual Percent Change (APC) is significantly different from zero at the alpha = 0.05 level.  
Final Selected Model: 1 Joinpoint.

**Missing / Women: 1 Joinpoint**

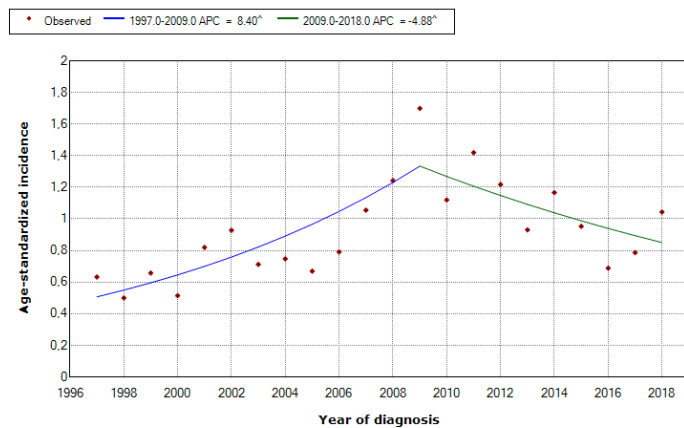

<sup>\*</sup> Indicates that the Annual Percent Change (APC) is significantly different from zero at the alpha = 0.05 level.  
Final Selected Model: 1 Joinpoint.

**Missing / Men: 1 Joinpoint**

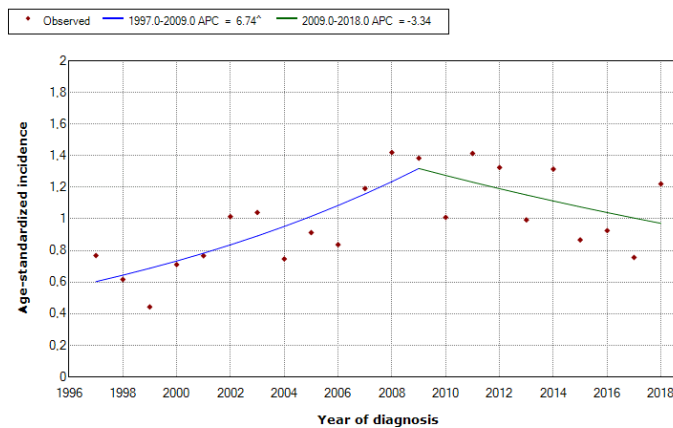

<sup>\*</sup> Indicates that the Annual Percent Change (APC) is significantly different from zero at the alpha = 0.05 level.  
Final Selected Model: 1 Joinpoint.
